# Supplementary material for: NLRP3 activation in macrophages promotes acute intestinal injury in neonatal necrotizing enterocolitis
Source: Springer Nature journal article supplement (doi:10.1007/s12519-023-00727-5), 2023-06-30
Supplement: MOESM1 [file 25559824]

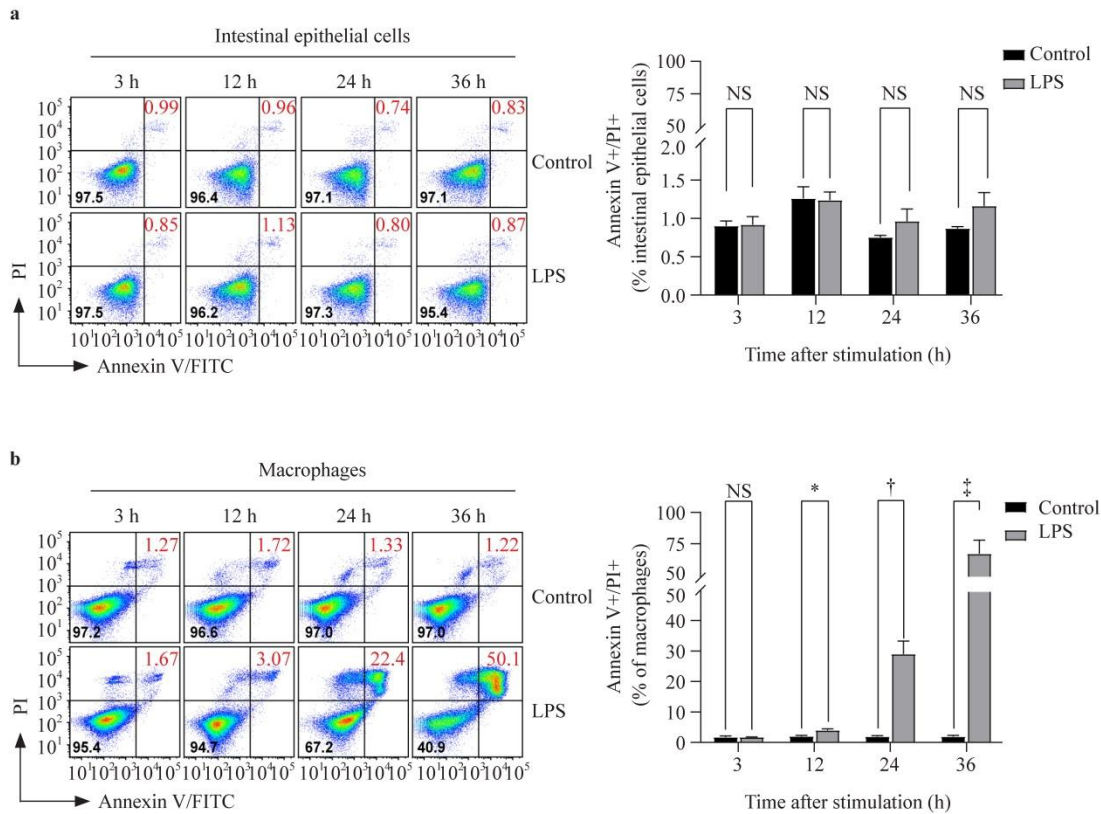

1

2 **Supplementary Fig. 1** LPS induces cell death of macrophages, but not intestinal  
 3 epithelial cells. **a, b** Flow cytometry plots of annexin V/PI staining in  
 4 macrophages/intestinal epithelial cells stimulated with LPS (1  $\mu$ g/mL) for 3 hours, 12  
 5 hours, 24 hours, and 36 hours. Bar graph shows percentages of annexin V/PI  
 6 double-stained macrophages/intestinal epithelial cells. Data are representative of three  
 7 independent in vitro experiments. Data are presented as mean  $\pm$  SEM. \* $P < 0.05$ , † $P <$   
 8 0.01, ‡ $P < 0.001$ . LPS lipopolysaccharide, PI propidium iodide, FITC fluorescein  
 9 isothiocyanate, SEM standard error of the mean, NS no significant difference

10

11

12

13

14

15

16

17

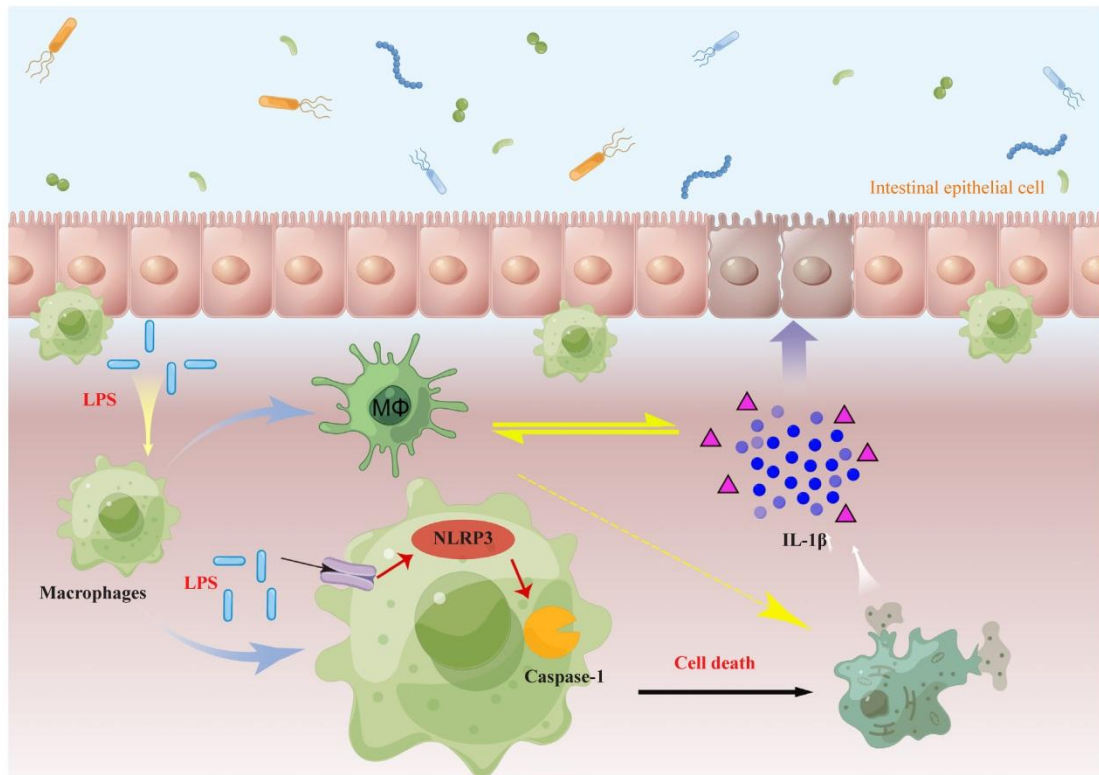

18

19 **Supplementary Fig. 2** Mechanism of intestinal epithelial cells injury mediated by  
 20 macrophage pyroptosis (by Figdraw). Infection and other factors trigger the abnormal  
 21 activation of NLRP3 in intestinal macrophages, which mediates the pyroptosis of  
 22 macrophages, secretion of inflammatory mediator and the following intestinal  
 23 epithelial cell injury. *NLRP3* nucleotide-binding oligomerization domain, leucine-rich  
 24 repeat, and pyrin domain-containing 3, *LPS* lipopolysaccharide, *IL* interleukin

25

26
